# Supplementary material for: Co-immobilized recombinant glycosyltransferases efficiently convert rebaudioside A to M in cascade
Source: Royal Society of Chemistry journal article supplement (doi:10.1039/d0ra10574k), 2021-01-01
Supplement: d0ra10574k1.pdf [file d0ra10574k1.pdf]

### Supplementary Figures

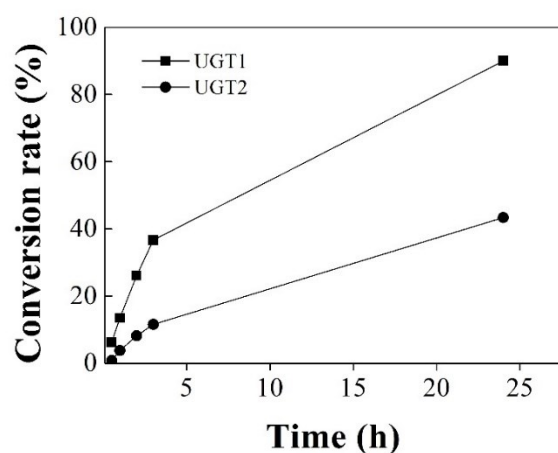

Supplementary Fig.1 The conversion rate with different time changes

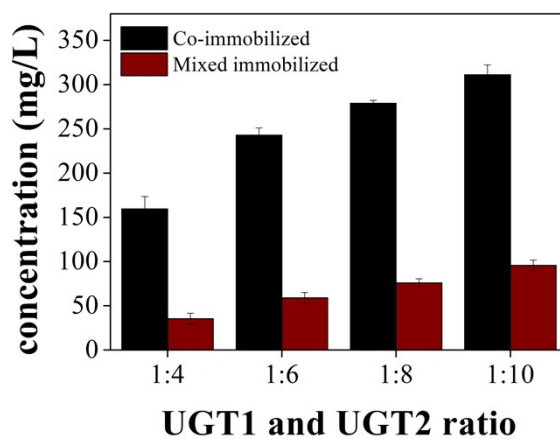

Supplementary Fig.2 The activity of co-immobilized UGTs compared with that of mixed immobilized UGTs

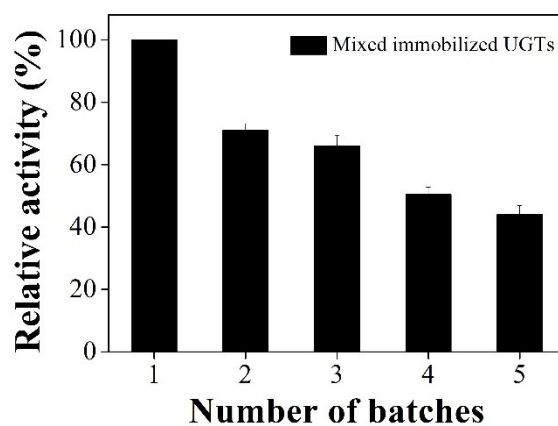

Supplementary Fig.3 Operational stability of the mixed immobilized UGTs. The specific activity of the first cycle was considered as 100%.
